# Supplementary material
Source: publisher site journal article supplement (https://www.dovepress.com/article/411815)
Supplement: Supplementary file 1 [file get_supplementary_file.php]

**Supplementary** **figures and** **figure** **legends**

**
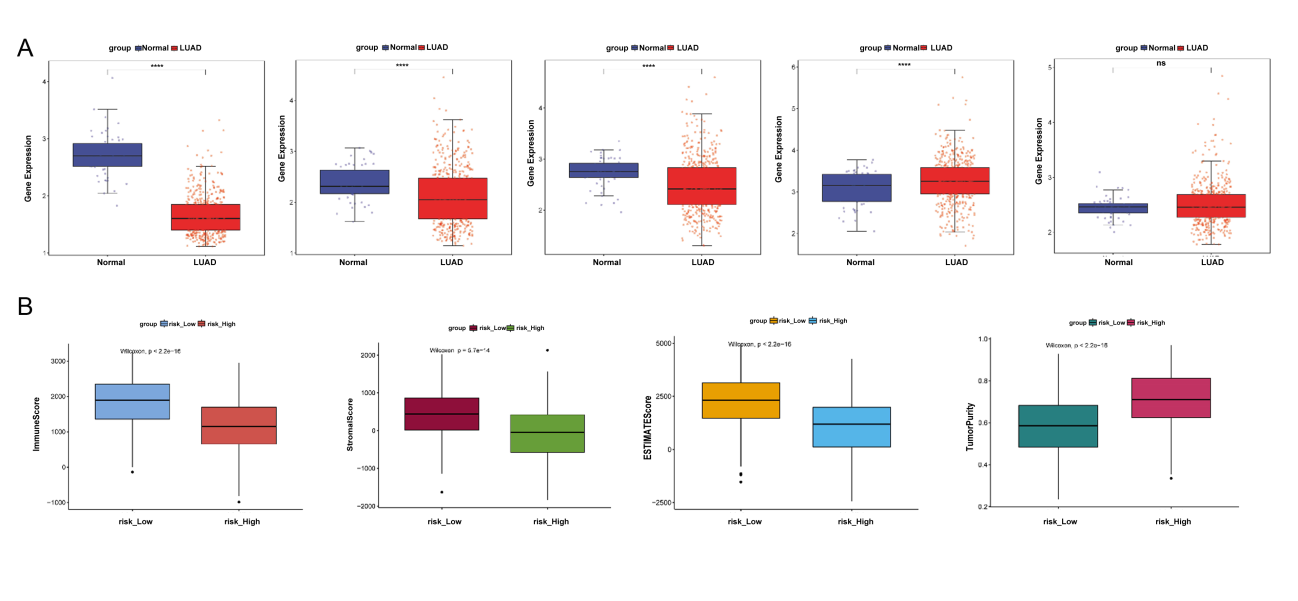
Supplementary Figure 1.** Expression of characteristic genes and immune infiltration. A) Expression of characteristic genes in normal samples and LUAD samples. From left to right: NLRC4, NLRP1, NOD1, PLCG1 and CASP9; B) Estimation of immune infiltration in LUAD patients with high and low-score risk. **P* < 0.05; ***P* < 0.01; *** *P* < 0.001; **** *P* < 0.0001; ns: not significant.

**
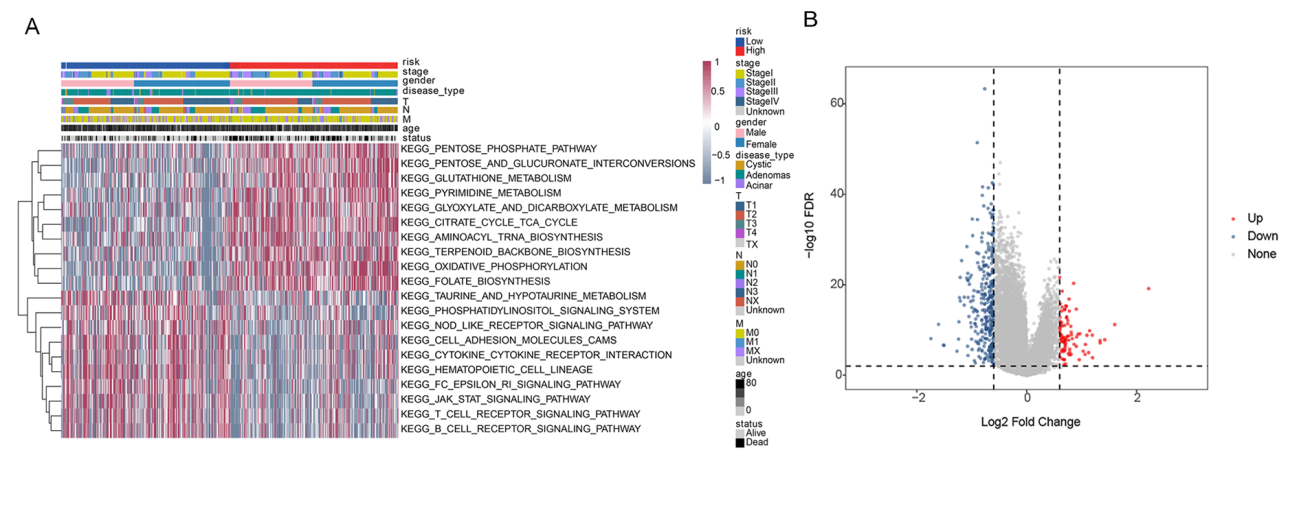
**

**Supplementary Figure 2.** The difference of TMB and GO enrichment of genes between high and low-risk score groups. A) The significant pathway between high and low-risk score groups analyzed by GSVA; B) volcano map of differential expression genes.
